# Supplementary material for: Resveratrol supplementation confers neuroprotection in cortical brain tissue of nonhuman primates fed a high-fat/sucrose diet
Source: PubMed Central journal article supplement (PMC4931843; doi:10.18632/aging.100942), 2016-04-09
Supplement: aging-08-0899-s001.pdf [file aging-08-0899-s001.pdf]

## SUPPLEMENTAL DATA

**Supplemental Table 1.** List of shared GOTerms significantly enriched in both HFS\_SD and HFS+R\_HFS pairwise comparisons.

| GoTerm                                                  | N genes | Z-score<br>(HFS_SD) | Z-score<br>(HFS+R_HFS) |
|---------------------------------------------------------|---------|---------------------|------------------------|
| GO0002062 CHONDROCYTE DIFFERENTIATION                   | 6       | 4.2403              | -2.2720                |
| GO0030010 ESTABLISHMENT OF CELL POLARITY                | 7       | 3.3006              | -2.4411                |
| GO0030137 COPI COATED VESICLE                           | 6       | 2.7585              | -3.4888                |
| GO0016272 PREFOLDIN COMPLEX                             | 7       | 2.6731              | 4.2071                 |
| GO0050681 ANDROGEN RECEPTOR BINDING                     | 20      | -1.8098             | 2.9116                 |
| GO0004428 INOSITOL OR PHOSPHATIDYLINOSITOL KINASE       | 12      | -1.9444             | 2.2001                 |
| GO0015288 PORIN ACTIVITY                                | 30      | -1.9502             | 2.8902                 |
| GO0030218 ERYTHROCYTE DIFFERENTIATION                   | 18      | -1.9730             | 1.7746                 |
| GO0007264 SMALL GTPASE MEDIATED SIGNAL TRANSDUCTION     | 210     | -2.4826             | 4.6322                 |
| GO0004721 PHOSPHOPROTEIN PHOSPHATASE ACTIVITY           | 129     | -2.5996             | 4.0727                 |
| GO0003723 RNA BINDING                                   | 536     | -2.8103             | 4.7800                 |
| GO0006915 APOPTOSIS                                     | 417     | -2.8134             | 2.1335                 |
| GO0018108 PEPTIDYL TYROSINE PHOSPHORYLATION             | 25      | -2.8393             | 2.3433                 |
| GO0051028 MRNA TRANSPORT                                | 64      | -2.9635             | 3.6905                 |
| GO0007049 CELL CYCLE                                    | 462     | -2.9651             | 4.1788                 |
| GO0006511 UBIQUITIN DEPENDENT PROTEIN CATABOLIC PROCESS | 118     | -2.9815             | 4.4421                 |
| GO0000070 MITOTIC SISTER CHROMATID SEGREGATION          | 12      | -2.9990             | 2.0672                 |
| GO0006470 PROTEIN AMINO ACID DEPHOSPHORYLATION          | 127     | -3.0079             | 3.9043                 |
| GO0042802 IDENTICAL PROTEIN BINDING                     | 146     | -3.0352             | 3.7537                 |
| GO0006357 REGULATION OF TRANSCRIPTION FROM RNA POL      | 194     | -3.0606             | 3.9896                 |
| GO0016787 HYDROLASE ACTIVITY                            | 1329    | -3.1339             | 3.1600                 |
| GO0003700 TRANSCRIPTION FACTOR ACTIVITY                 | 916     | -3.2249             | 2.6877                 |
| GO0008285 NEGATIVE REGULATION OF CELL PROLIFERATION     | 181     | -3.2625             | 4.0025                 |
| GO0004842 UBIQUITIN PROTEIN LIGASE ACTIVITY             | 128     | -3.2880             | 3.1958                 |
| GO0016874 LIGASE ACTIVITY                               | 269     | -3.3764             | 3.8752                 |
| GO0005768 ENDOSOME                                      | 170     | -3.6613             | 3.8803                 |
| GO0006810 TRANSPORT                                     | 1485    | -3.6900             | 3.4847                 |
| GO0006974 RESPONSE TO DNA DAMAGE STIMULUS               | 170     | -3.7341             | 2.6275                 |
| GO0005643 NUCLEAR PORE                                  | 67      | -3.7788             | 4.1905                 |
| GO0008380 RNA SPLICING                                  | 188     | -3.8151             | 3.0931                 |
| GO0006281 DNA REPAIR                                    | 196     | -3.8201             | 3.6090                 |
| GO0006397 MRNA PROCESSING                               | 229     | -3.9536             | 4.1352                 |
| GO0005783 ENDOPLASMIC RETICULUM                         | 658     | -3.9581             | 5.0192                 |
| GO0006260 DNA REPLICATION                               | 128     | -4.0831             | 2.0360                 |
| GO0007399 NERVOUS SYSTEM DEVELOPMENT                    | 289     | -4.1914             | 2.3647                 |
| GO0005794 GOLGI APPARATUS                               | 594     | -4.2990             | 2.4954                 |
| GO0005622 INTRACELLULAR                                 | 1253    | -4.4245             | 4.0702                 |
| GO0005681 SPLICEOSOME                                   | 135     | -4.4959             | 3.2754                 |
| GO0015031 PROTEIN TRANSPORT                             | 476     | -4.7363             | 6.3000                 |
| GO0006512 UBIQUITIN CYCLE                               | 384     | -4.7990             | 5.8876                 |
| GO0005085 GUANYL NUCLEOTIDE EXCHANGE FACTOR ACTIVITY    | 112     | -4.8455             | 3.3750                 |
| GO0046872 METAL ION BINDING                             | 2047    | -5.2149             | 4.2788                 |
| GO0008150 BIOLOGICAL PROCESS                            | 1481    | -5.3245             | 5.7086                 |
| GO0000166 NUCLEOTIDE BINDING                            | 1586    | -5.4279             | 2.4367                 |
| GO0005575 CELLULAR COMPONENT                            | 1441    | -5.5147             | 6.1531                 |
| GO0003674 MOLECULAR FUNCTION                            | 1417    | -5.7890             | 6.7542                 |
| GO0003677 DNA BINDING                                   | 1676    | -6.0118             | 2.4020                 |
| GO0003676 NUCLEIC ACID BINDING                          | 768     | -6.0565             | 4.3375                 |
| GO0016020 MEMBRANE                                      | 4837    | -6.3726             | 4.1302                 |
| GO0016021 INTEGRAL TO MEMBRANE                          | 3894    | -6.4015             | 2.3046                 |
| GO0008270 ZINC ION BINDING                              | 1568    | -6.6694             | 4.6477                 |
| GO0006350 TRANSCRIPTION                                 | 1380    | -6.8999             | 4.6749                 |
| GO0006355 REGULATION OF TRANSCRIPTION DNA DEPENDENT     | 1670    | -7.0525             | 4.4861                 |
| GO0005737 CYTOPLASM                                     | 3237    | -7.5834             | 6.1063                 |
| GO0005515 PROTEIN BINDING                               | 4416    | -8.1867             | 6.5947                 |
| GO0005634 NUCLEUS                                       | 3662    | -10.9629            | 7.7421                 |

All GOTerms were statistically significant with Z-score >1.5 in either direction, p<0.05 and false discovery rate <0.3. See Materials and Methods for additional details. Red font: Up-regulated GOTerms; blue font: Down-regulated GOTerms; yellow cell: Lone GOTerm significantly increased by both pairwise comparisons.

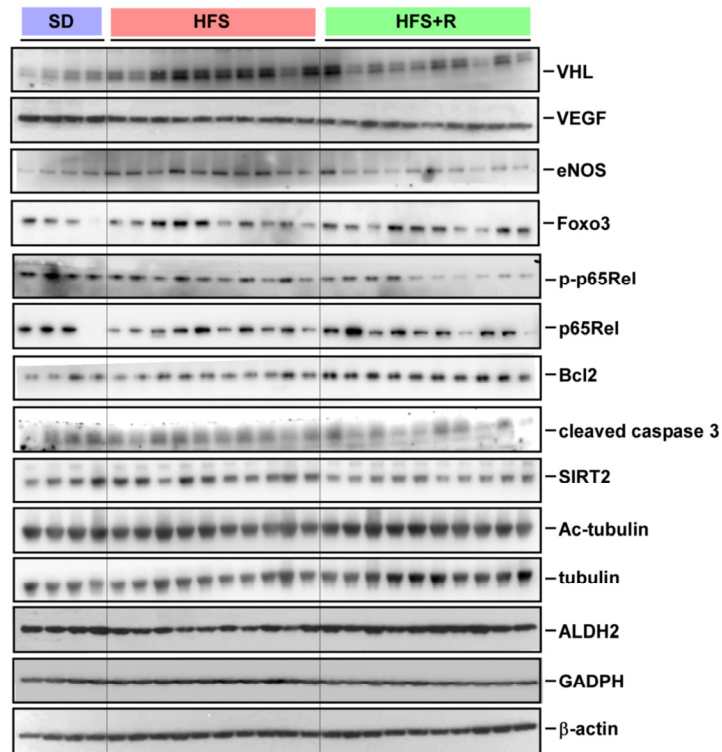

**Supplemental Figure 1. Immunoblots used for quantitative analysis.** Solubilized cerebral cortex extracts from SD-(n=4), HFS- (n=10) and HFS+R-fed animals (n=10) were resolved by SDS-PAGE under reducing conditions, electrotransferred onto nitrocellulose membranes and subjected to immunoblotting using the indicated primary antibodies. Probing membranes with GADPH and  $\beta$ -actin demonstrated equal loading in each lane. Bands of interest were quantitated by densitometry and normalized to Ponceau S staining of the membranes.
